# Supplementary material for: Differentiation of light-chain cardiac amyloidosis from hypertrophic cardiomyopathy using myocardial mechanical parameters by velocity vector imaging echocardiography
Source: Springer Nature journal article supplement (doi:10.1007/s10554-016-1027-5), 2016-11-23
Supplement: MOESM1 [file 11089988]

**Supplemental Table 1. ENDO and EPI ROT of basal and apical LV**

|  | **AL-CA (n=35)** | **HCM (n=35)** | **CONTROL (n=30)** | **P value** |
| --- | --- | --- | --- | --- |
| **ROT(°)** |  |  |  |  |
| Basal LV |  |  |  |  |
| ENDO | -3.1±2.1* | -4.4±2.8▲ | -6.9±3.8 | ＜0.001 |
| EPI | -1.8±1.2* | -2.5±1.8 | -2.8±1.8 | ＜0.05 |
| Apical LV |  |  |  |  |
| ENDO | 5.4±3.1 | 6.1±2.9 | 7.3±3.4 | NS |
| EPI | 3.5±1.7 | 3.7±2.2 | 4.6±2.7 | NS |
| **TWI (°)** |  |  |  |  |
| ENDO | 8.8±4.1* | 10.9±4.8▲ | 13.5±6.4 | ＜0.001 |
| EPI | 5.6±2.5 | 6.5±2.5 | 7.2±3.8 | NS |

*P<0.05 AL-CA vs control; ▲P<0.05 HCM vs control, by One-Way ANOVA followed by post-hoc Student–Newman–Keuls test for pairwise comparisons.

**Supplemental Table 2. Intraclass correlation coefficient (ICC) analysis**

|  | Parameter | ICC | 95%CI |
| --- | --- | --- | --- |
| LS | Inter-observer  Intra-observer | 0.88  0.90 | 0.55-0.98  0.67-0.95 |
| CS | Inter-observer  Intra-observer | 0.82  0.88 | 0.45-0.95  0.60-0.98 |
| RS | Inter-observer  Intra-observer | 0.90  0.88 | 0.65-0.98  0.55-0.98 |
| ROT | Inter-observer  Intra-observer | 0.88  0.92 | 0.54-0.95  0.66-0.99 |

ICC: intraclass correlation coefficient; CI: confident interval; LS: longitudinal strain; CS: circumferential strain; RS: radial strain; ROT: rotation.
